# Supplementary material
Source: MDPI journal article supplement (https://www.mdpi.com/2071-1050/15/23/16469)
Supplement: s1 [file s1]

**Table S4** Analytic table of the plant community growing on grave mounds (Cluster C).

| ID PLOT                                                                                              | 29 | 30 | 42  | 41  | 11 | 28 | 21 | 27 | 36  | 35  | 31  | 32  | 33  | 34  | 39  | 40  | 37 | 38 |
|------------------------------------------------------------------------------------------------------|----|----|-----|-----|----|----|----|----|-----|-----|-----|-----|-----|-----|-----|-----|----|----|
| Aspect (°)                                                                                           | S  | N  | SW  | NE  | -  | NW | -  | SE | NE  | SW  | NW  | SE  | S   | N   | SE  | NW  | SE | NW |
| Slope (°)                                                                                            | 18 | 18 | 25  | 25  | 0  | 16 | 0  | 7  | 25  | 25  | 30  | 30  | 25  | 25  | 25  | 25  | 30 | 30 |
| Total vegetation cover (%)                                                                           | 90 | 90 | 100 | 100 | 80 | 90 | 90 | 85 | 100 | 100 | 100 | 100 | 100 | 100 | 100 | 100 | 95 | 95 |
| Species richness                                                                                     | 36 | 32 | 37  | 32  | 39 | 46 | 28 | 35 | 28  | 41  | 41  | 45  | 38  | 35  | 37  | 40  | 54 | 39 |
| <b><i>Scrophulario-Helichrysetalia</i> S. Brullo 1984 and <i>Drypidetea spinosae</i> Quézel 1964</b> |    |    |     |     |    |    |    |    |     |     |     |     |     |     |     |     |    |    |
| <i>Urospermum dalechampii</i>                                                                        | +  | 2  | 3   | 3   | +  | 1  | 1  | 2  | 2   | 3   | 1   | +   | 1   | 1   | 3   | 2   | 2  |    |
| <i>Dactylis glomerata</i> subsp. <i>hispanica</i>                                                    | 1  |    | 2   | 2   | +  |    |    |    | 2   | 1   | 1   | 1   | 1   | 2   | 1   | 2   | 3  | 1  |
| <i>Verbascum sinuatum</i>                                                                            |    |    |     |     | +  |    |    |    |     | +   | +   | +   |     |     |     |     | +  |    |
| <i>Sisylx atropurpurea</i>                                                                           |    |    |     |     | +  | +  |    |    |     |     | +   | +   | +   | +   | +   |     | +  |    |
| <i>Chondrilla juncea</i>                                                                             |    |    |     |     |    |    |    |    |     |     |     |     | 1   | +   |     |     |    |    |
| <i>Linaria purpurea</i>                                                                              |    |    |     |     |    | +  |    | 1  |     |     |     |     |     |     |     |     | 2  | 1  |
| <i>Micromeria graeca</i> subsp. <i>tenuifolia</i>                                                    |    |    |     |     |    |    |    |    |     |     |     |     |     |     |     |     | +  |    |
| <b><i>Chenopodietea</i> Br.-Bl. in Br.-Bl. et al. 1952</b>                                           |    |    |     |     |    |    |    |    |     |     |     |     |     |     |     |     |    |    |
| <i>Tordylium apulum</i>                                                                              | 3  | 1  | 1   | 1   | 1  | 2  | 1  | 1  | 1   | +   | 1   | +   | 1   | +   | +   | +   | +  |    |
| <i>Sherardia arvensis</i>                                                                            | 2  | 1  | 1   | +   | +  | +  | +  | 1  |     | +   | +   | +   |     | +   | +   | +   | +  |    |
| <i>Scandix pecten-veneris</i>                                                                        | +  |    | 1   | +   | +  |    |    | 1  |     |     |     |     |     |     |     |     |    |    |
| <i>Euphorbia helioscopia</i>                                                                         | +  | +  |     |     | +  | 2  | +  | +  |     | +   | +   | +   | +   | +   | +   | +   |    | +  |
| <i>Reichardia picroides</i>                                                                          | 1  |    | +   | 2   |    | 2  | 1  | 2  | 1   | 1   | 2   | 3   | 1   |     | +   | +   | +  | +  |
| <i>Medicago polymorpha</i>                                                                           |    |    | 1   |     |    |    |    | 2  | +   | +   |     |     |     |     |     |     |    |    |
| <i>Malva sylvestris</i>                                                                              |    |    | +   | +   |    |    |    |    |     | 1   |     | +   |     | +   | +   | +   | +  |    |
| <i>Geranium molle</i>                                                                                | +  | 1  | +   |     |    |    |    |    |     |     |     |     |     |     |     |     |    |    |
| <i>Dasypyrum villosus</i>                                                                            | 3  | +  | 2   | 3   |    |    |    |    | +   |     | +   | +   |     | +   | +   | +   |    |    |
| <i>Avena sterilis</i>                                                                                | +  |    |     |     |    | +  |    |    | +   | +   |     | +   |     |     | +   |     |    | +  |
| <i>Erodium ciconium</i>                                                                              |    |    |     |     |    |    |    |    |     |     |     |     |     |     | +   |     |    |    |
| <i>Foeniculum vulgare</i>                                                                            | +  | +  |     |     |    |    | 1  |    | 3   | 3   | +   | +   | 1   |     |     |     | +  |    |
| <i>Echium plantagineum</i>                                                                           | +  |    | 1   | 1   |    |    |    |    |     | 1   | 1   | 1   | 2   | 1   | 2   | 1   | +  | 1  |
| <i>Lotus orithopodioides</i>                                                                         |    |    |     |     | +  | +  | 1  | +  |     | +   | 1   | +   | +   | +   | +   | +   | +  | +  |
| <i>Avena barbata</i>                                                                                 |    |    | 2   | 1   | +  | +  | +  |    | +   | +   | +   | +   | 1   | +   | +   | 2   | +  | 1  |
| <i>Plantago lagopus</i>                                                                              | +  |    |     | +   | 2  | +  |    |    |     |     |     |     |     |     |     |     |    |    |
| <i>Calendula arvensis</i>                                                                            | +  |    |     | +   | +  |    | +  | +  |     |     |     | +   |     |     | +   |     | +  |    |
| <i>Festuca ligustica</i>                                                                             |    | +  |     |     |    |    |    |    |     |     |     |     |     |     |     |     |    |    |
| <i>Reseda lutea</i>                                                                                  |    | +  |     |     |    |    |    |    |     | +   |     |     |     |     | 1   | 1   | +  |    |
| <i>Poa annua</i>                                                                                     |    | +  |     |     |    |    |    |    |     |     |     |     |     |     |     |     |    |    |
| <i>Sonchus oleraceus</i>                                                                             | +  |    | +   | +   |    |    |    |    |     |     | +   | +   |     |     |     |     |    |    |
| <i>Rostraria cristata</i>                                                                            |    |    | +   |     |    |    |    |    |     |     |     |     | +   | +   |     |     | +  | +  |
| <i>Sonchus asper</i>                                                                                 |    |    |     |     |    |    |    |    | +   | +   |     |     |     |     |     | +   | +  |    |
| <i>Vicia sativa</i>                                                                                  |    |    | +   | +   |    | +  |    |    |     |     | +   |     |     |     |     |     |    | +  |
| <i>Bromus madritensis</i>                                                                            | 1  |    |     |     |    |    |    |    |     |     |     |     |     |     |     |     |    |    |
| <i>Papaver rhoeas</i>                                                                                |    |    |     |     |    |    |    |    |     |     | +   | +   |     |     |     | +   | +  | +  |
| <i>Crepis sancta</i>                                                                                 |    | +  |     |     | +  | 1  | 2  | 1  |     |     |     |     |     | +   |     |     |    |    |
| <i>Trifolium campestre</i>                                                                           |    |    | 1   | +   |    |    |    |    | 1   |     | +   |     | +   | 1   |     | 1   | +  | +  |
| <i>Crepis bursifolia</i>                                                                             |    |    | +   | +   |    |    |    |    |     |     |     |     |     |     |     |     |    |    |
| <i>Anthemis arvensis</i>                                                                             |    |    | +   | +   |    |    | +  | +  | +   | +   | 1   | +   | +   | +   | 1   | 1   | +  | 1  |
| <i>Lactuca serriola</i>                                                                              |    | 1  |     |     |    |    |    |    |     |     |     |     |     |     |     |     |    |    |
| <i>Silene gallica</i>                                                                                |    |    |     |     |    |    |    |    |     |     |     | +   | +   |     |     |     | +  |    |

|                                                                                                                                                   |  |   |   |   |   |   |   |   |   |   |   |   |   |   |   |   |   |   |   |   |   |
|---------------------------------------------------------------------------------------------------------------------------------------------------|--|---|---|---|---|---|---|---|---|---|---|---|---|---|---|---|---|---|---|---|---|
| <i>Cynodon dactylon</i>                                                                                                                           |  |   |   |   |   | 1 | 1 |   |   |   |   | + | + |   | 1 |   |   |   | + |   | + |
| <b><i>Hypochoeridion Achyrophori</i> Biondi et Guerra 2008</b>                                                                                    |  |   |   |   |   |   |   |   |   |   |   |   |   |   |   |   |   |   |   |   |   |
| <i>Hypochoaeris achyrophorus</i>                                                                                                                  |  |   | + |   |   |   |   | + |   | + |   |   |   |   | + | 1 | 2 |   | + | + |   |
| <i>Campanula erinus</i>                                                                                                                           |  |   |   |   |   |   |   |   |   | + |   |   |   |   |   |   |   |   |   |   |   |
| <i>Medicago truncatula</i>                                                                                                                        |  | 3 | + | 1 | 1 | + | + |   | + | + | 1 | 1 | 1 | 1 | 1 | 1 | 1 |   |   | + |   |
| <i>Medicago minima</i>                                                                                                                            |  |   |   |   |   |   |   |   |   |   | + | + |   |   |   |   |   |   | + |   |   |
| <i>Ononis reclinata</i>                                                                                                                           |  |   |   |   | + | + | + | + | + |   |   | + | 2 | 1 | + | + | + | 1 | 1 | + |   |
| <i>Aegilops geniculata</i>                                                                                                                        |  | + |   | + |   | + | 2 | 1 | 1 |   | + |   | + | + | + | + | + |   | + | + |   |
| <b><i>Ptilostemono stellati-Vulpietalia ciliatae</i> Mucina ined. and <i>Stipo-Trachynietea distachyae</i> S. Brullo in S. Brullo et al. 2001</b> |  |   |   |   |   |   |   |   |   |   |   |   |   |   |   |   |   |   |   |   |   |
| <i>Plantago bellardii</i>                                                                                                                         |  |   |   |   |   |   |   |   |   |   |   |   |   |   |   |   |   |   | + | + |   |
| <i>Lagurus ovatus</i>                                                                                                                             |  |   |   | + |   |   |   |   |   |   |   | + |   |   |   |   |   |   |   |   |   |
| <i>Onobrychis caput-galli</i>                                                                                                                     |  |   |   |   |   | 2 | 2 | + |   | 1 | + | 1 | 2 |   |   |   | 1 | + | + | + |   |
| <i>Romulea columnae</i>                                                                                                                           |  |   |   |   |   |   | + |   |   |   |   |   |   |   |   |   |   |   |   |   |   |
| <i>Crepis neglecta</i>                                                                                                                            |  |   |   |   |   |   |   |   | + |   |   |   |   |   |   |   |   |   |   |   |   |
| <i>Trifolium scabrum</i>                                                                                                                          |  |   | + | 1 | + |   |   |   |   | + | + | + | + | 2 | 1 | + | + | + | + |   |   |
| <i>Briza maxima</i>                                                                                                                               |  |   |   |   |   |   |   |   |   |   |   |   |   |   |   |   |   |   | + | + |   |
| <i>Hippocrepis biflora</i>                                                                                                                        |  |   |   |   |   |   | + |   |   |   |   |   |   |   |   |   |   |   |   | + |   |
| <i>Trifolium stellatum</i>                                                                                                                        |  | 1 | + | 1 | + | + | + | + | + | 3 | 1 | 2 | 1 | 1 | 4 | 1 | 2 |   |   | 1 |   |
| <i>Festuca ambigua</i>                                                                                                                            |  |   |   |   |   |   |   |   |   |   | 1 | + | + | + | + | + | + | + | + | + |   |
| <b><i>Scorzoneretalia villosae</i> Kovač ević 1959 and <i>Festuco-Brometea</i> Br.-Bl. et Tx. ex Soó 1947</b>                                     |  |   |   |   |   |   |   |   |   |   |   |   |   |   |   |   |   |   |   |   |   |
| <i>Sanguisorba minor</i>                                                                                                                          |  |   |   |   |   | 1 | + |   |   |   |   |   |   |   |   |   |   |   | 2 | 2 |   |
| <i>Onosma echioides</i>                                                                                                                           |  |   |   |   |   |   |   |   | + |   |   |   |   |   |   |   |   |   |   |   |   |
| <i>Convolvulus cantabrica</i>                                                                                                                     |  | + | + | 2 | + | + | 1 | + | 1 | 1 | 2 | 3 | 4 | 5 | 3 | 2 | 2 | 1 |   |   |   |
| <i>Centaurea aspera</i>                                                                                                                           |  | 1 | + | 1 | 2 | + |   |   | 1 | + |   | + |   | + | 2 | 3 | 3 |   |   | 1 |   |
| <i>Petrorhagia saxifraga</i>                                                                                                                      |  | + | 2 | + | + | + |   |   |   |   | 1 | 1 | 1 |   |   | + | + | + |   |   |   |
| <i>Anthyllis vulneraria</i> subsp. <i>rubriflora</i>                                                                                              |  |   |   |   |   |   | 1 |   |   |   |   |   |   |   |   |   |   |   |   |   |   |
| <i>Ophrys bombyliflora</i>                                                                                                                        |  |   |   |   |   | 1 | + |   |   |   |   |   |   |   |   |   |   |   |   | + |   |
| <i>Teucrium capitatum</i>                                                                                                                         |  |   |   |   |   |   | + |   |   |   |   |   |   |   |   |   |   |   |   |   |   |
| <i>Bromus erectus</i>                                                                                                                             |  |   |   |   | + |   |   |   |   |   |   |   |   |   |   |   |   | 1 | 2 | 3 |   |
| <b><i>Artemisietea vulgaris</i> Lohmeyer et al. in Tx. ex von Rochow1951</b>                                                                      |  |   |   |   |   |   |   |   |   |   |   |   |   |   |   |   |   |   |   |   |   |
| <i>Picris hieracioides</i>                                                                                                                        |  | + |   |   |   |   |   |   |   |   | + | + |   |   |   |   |   |   |   | + |   |
| <i>Tragopogon porrifolius</i>                                                                                                                     |  | + | + |   |   |   | + | 1 |   |   | + | + | + |   |   | + |   |   |   |   |   |
| <i>Poa bulbosa</i>                                                                                                                                |  |   | + | + |   | + |   |   |   |   |   |   |   |   |   |   |   |   |   |   |   |
| <i>Diplotaxis tenuifolia</i>                                                                                                                      |  |   |   |   | + |   |   | + |   |   |   |   |   |   |   | + |   |   | + |   |   |
| <i>Blackstonia perfoliata</i>                                                                                                                     |  |   |   |   |   |   |   |   |   |   |   |   | + |   |   |   |   |   | + |   |   |
| <i>Plantago lanceolata</i>                                                                                                                        |  | + | 2 | 2 | 1 | 1 | 1 | + | 2 | 1 | 1 | 2 | 1 | 1 | 1 | 1 | 1 | 1 | + | + |   |
| <i>Leontodon tuberosus</i>                                                                                                                        |  | + |   |   | 1 |   |   | + |   |   |   |   | + | + |   |   | + | + | + |   |   |
| <i>Medicago sativa</i>                                                                                                                            |  | 1 |   |   |   |   |   | 1 |   | 1 | 2 | 1 | 1 |   |   |   |   | 1 | + |   |   |
| <i>Convolvulus althaeoides</i>                                                                                                                    |  |   |   | + | + |   |   |   |   | + | + |   |   |   |   |   |   |   |   |   |   |
| <i>Medicago orbicularis</i>                                                                                                                       |  |   |   |   |   |   |   |   |   |   |   |   |   |   |   |   |   |   | + |   |   |
| <i>Salvia verbenaca</i>                                                                                                                           |  | + | + | + | + | + | + | + | 1 | 3 | 1 | + | + | + | + | + | + | + | + |   |   |
| <i>Anemone hortensis</i>                                                                                                                          |  |   | + |   |   |   |   | + |   |   |   |   |   |   |   |   |   |   |   |   |   |
| <i>Anchusa undulata</i>                                                                                                                           |  |   |   |   |   | + | + |   |   |   |   |   |   |   |   |   |   |   |   |   |   |
| <b>Companions</b>                                                                                                                                 |  |   |   |   |   |   |   |   |   |   |   |   |   |   |   |   |   |   |   |   |   |
| <i>Astragalus hamosus</i>                                                                                                                         |  |   |   | 1 |   |   |   |   | 1 | 1 | 1 | 2 | 1 | + |   |   |   |   |   |   |   |
| <i>Seseli tortuosum</i>                                                                                                                           |  | + | + | + |   | 1 | + | 1 | 1 | + | 1 | + | + | 1 | 2 | 1 | 2 | 1 | 1 |   |   |
| <i>Hyoseris radiata</i>                                                                                                                           |  | + | 2 | + |   | 3 | 2 | 1 | 3 | 2 | 1 | 2 | + | + | 1 | 2 |   | 2 | 3 |   |   |
| <i>Catapodium rigidum</i>                                                                                                                         |  |   |   |   |   | + | + |   |   |   | + |   | + | + | + |   |   | + | + |   |   |

|                                   |   |   |   |   |   |   |   |   |   |   |   |   |   |   |   |
|-----------------------------------|---|---|---|---|---|---|---|---|---|---|---|---|---|---|---|
| <i>Ajuga iva</i>                  | + |   |   | + |   |   | + |   | + | + |   |   |   |   | + |
| <i>Lysimachia arvensis</i>        |   |   |   |   |   |   | + |   | + | + |   |   |   | + |   |
| <i>Trisetaria panicea</i>         |   |   |   |   |   |   |   | + | + |   | + | + | + | + |   |
| <i>Carduus nutans</i>             |   |   |   |   | + | + |   |   |   |   |   |   |   | + | + |
| <i>Erodium cicutarium</i>         |   |   |   |   | + | + |   |   | + | + |   | + |   |   |   |
| <i>Pallenis spinosa</i>           |   |   |   |   |   | + |   |   |   |   |   |   |   | 1 | + |
| <i>Allium roseum</i>              | + | + |   |   |   |   |   |   |   |   |   |   | + | + |   |
| <i>Lolium perenne</i>             |   |   |   |   | + |   |   |   | + |   |   | + |   |   |   |
| <i>Anisantha diandra</i>          |   |   |   |   |   | + |   |   |   |   |   |   |   | + | + |
| <i>Vicia hybrida</i>              | + | + |   |   |   |   |   |   |   | + |   |   |   |   |   |
| <i>Anisantha rubens</i>           |   |   |   |   |   |   |   | + |   | + |   | + |   |   |   |
| <i>Asphodelus microcarpus</i>     |   |   | + |   |   |   | + |   |   |   |   |   |   |   |   |
| <i>Ornithogalum narbonense</i>    | + | + |   |   |   |   |   |   |   |   |   |   |   |   |   |
| <i>Anthyllis circinnata</i>       |   |   |   | + |   | + |   |   |   |   |   |   |   |   |   |
| <i>Lysimachia linum-stellatum</i> |   |   |   |   | + | + |   |   |   |   |   |   |   |   |   |
| <i>Aphanes arvensis</i>           |   |   |   |   |   |   |   |   |   |   |   |   |   |   | + |
| <i>Sonchus bulbosus</i>           |   |   | + |   |   |   |   |   |   |   |   |   |   |   |   |
| <i>Cerastium glomeratum</i>       |   |   |   |   |   | + |   | + |   |   | + |   |   |   | + |
| <i>Serapias parviflora</i>        |   |   |   |   |   |   | + |   |   |   |   |   |   |   |   |
| <i>Leopoldia comosa</i>           |   |   |   |   |   |   |   |   |   |   |   |   |   | + |   |
| <i>Phleum hirsutum</i>            |   |   |   |   |   |   |   |   |   |   | + | + |   |   |   |
| <i>Hypericum perforatum</i>       |   |   |   |   |   |   |   |   |   |   |   |   |   |   | + |
| <i>Clinopodium nepeta</i>         |   |   |   | 1 |   | 1 | 2 | + | + |   | + |   | 1 | + | 2 |
| <i>Cirsium vulgare</i>            |   |   |   |   |   |   | + |   | 1 |   |   |   |   |   |   |
| <i>Lathyrus cicera</i>            | 1 |   |   | + | + | + |   | + |   | 1 |   |   |   |   | + |
| <i>Valeriana eriocarpa</i>        |   |   |   |   | + | + | + |   |   |   |   |   |   | 1 | + |
| <i>Echium italicum</i>            | + |   |   |   |   |   |   | + |   |   |   |   |   |   |   |
| <i>Cuscuta epithymum</i>          |   |   |   |   |   | 1 |   | 1 |   |   |   |   |   | 1 | + |
| <i>Ferula communis</i>            |   |   | + |   |   |   |   |   |   |   |   |   |   |   |   |
| <i>Scorpiurus muricatus</i>       |   |   |   |   |   |   |   |   |   |   | + |   |   |   |   |
