# Supplementary material
Source: MDPI journal article supplement (https://www.mdpi.com/2071-1050/15/23/16469)
Supplement: s1 [file s1]

**Table S3** Analytic table of shrub formations of Mediterranean scrub dominated by *Rhamnus alaternus* (Cluster A).

| ID PLOT                                                                                                                                                         | 20  | 18  | 16  | 17  | 19  |
|-----------------------------------------------------------------------------------------------------------------------------------------------------------------|-----|-----|-----|-----|-----|
| Aspect (°)                                                                                                                                                      | N   | N   | NW  | N   | N   |
| Slope (°)                                                                                                                                                       | 5   | 5   | 8   | 5   | 5   |
| Total vegetation cover (%)                                                                                                                                      | 100 | 100 | 100 | 100 | 100 |
| Species richness                                                                                                                                                | 39  | 25  | 20  | 21  | 25  |
| <b><i>Oleo-Ceratonion siliquae</i> Br.-Bl. ex Guinochet et Drouineau 1944</b>                                                                                   |     |     |     |     |     |
| <i>Phillyrea latifolia</i>                                                                                                                                      | 2   | 3   | 3   |     |     |
| <i>Clematis flammula</i>                                                                                                                                        | 1   | +   | 1   | 1   | 1   |
| <i>Rhamnus alaternus</i>                                                                                                                                        | +   | 3   | 3   | 5   | 5   |
| <i>Asparagus acutifolius</i>                                                                                                                                    | 2   | 1   | 1   | 1   | 2   |
| <i>Rubia peregrina</i>                                                                                                                                          | 1   | 1   | 2   | 1   | 3   |
| <i>Pistacia terebinthus</i>                                                                                                                                     | +   | 1   |     |     |     |
| <b><i>Pistacio lentisci-Rhamnetalia alaterni</i> Rivas-Mart. 1975 and <i>Quercetea ilicis</i> Br.-Bl. ex A. Bolòs et O. de Bolòs in A. Bolòs y Vayreda 1950</b> |     |     |     |     |     |
| <i>Fraxinus ornus</i>                                                                                                                                           |     | 1   |     |     |     |
| <i>Chamaerops humilis</i>                                                                                                                                       |     |     |     |     | 1   |
| <i>Brachypodium rupestre</i>                                                                                                                                    |     | +   | 4   | 5   | +   |
| <i>Spartium junceum</i>                                                                                                                                         | 4   | 2   | 3   | 2   | 1   |
| <i>Micromeria graeca</i> subsp. <i>tenuifolia</i>                                                                                                               |     |     |     |     | +   |
| <b><i>Chenopodietea</i> Br.-Bl. in Br.-Bl. et al. 1952</b>                                                                                                      |     |     |     |     |     |
| <i>Poa annua</i>                                                                                                                                                | 1   |     |     |     |     |
| <i>Carduus pycnocephalus</i>                                                                                                                                    |     | +   | +   | +   |     |
| <i>Sherardia arvensis</i>                                                                                                                                       |     |     |     |     | +   |
| <i>Trifolium campestre.</i>                                                                                                                                     |     | +   |     |     |     |
| <i>Reichardia picroides</i>                                                                                                                                     |     |     |     | +   | +   |
| <i>Euphorbia helioscopia</i>                                                                                                                                    |     | +   |     |     | +   |
| <i>Lotus ornithopodioides</i>                                                                                                                                   | +   |     |     |     |     |
| <i>Tordylium apulum</i>                                                                                                                                         | +   | +   | +   | +   |     |
| <i>Crepis bursifolia</i>                                                                                                                                        | 1   |     |     |     |     |
| <i>Anthemis arvensis</i>                                                                                                                                        |     | +   |     |     |     |
| <i>Plantago lagopus</i>                                                                                                                                         | +   |     |     |     |     |
| <i>Avena barbata</i>                                                                                                                                            |     |     |     |     | +   |
| <i>Scandix pecten-veneris</i>                                                                                                                                   | +   |     |     |     |     |
| <i>Reseda lutea</i>                                                                                                                                             | +   |     |     |     |     |
| <b><i>Artemisietea vulgaris</i> Lohmeyer et al. in Tx. ex von Rochow 1951</b>                                                                                   |     |     |     |     |     |
| <i>Picris hieracioides</i>                                                                                                                                      | 2   |     |     |     |     |
| <i>Salvia verbenaca</i>                                                                                                                                         |     |     |     |     | +   |
| <i>Leontodon tuberosus</i>                                                                                                                                      |     | +   | +   | +   | +   |
| <i>Plantago lanceolata</i>                                                                                                                                      | +   |     | +   |     | +   |
| <i>Anemone hortensis</i>                                                                                                                                        | 1   | +   | +   |     | +   |
| <i>Echium vulgare</i>                                                                                                                                           | 1   |     |     |     |     |
| <i>Medicago sativa</i>                                                                                                                                          | +   |     |     |     |     |
| <b>Companions</b>                                                                                                                                               |     |     |     |     |     |
| <i>Sonchus bulbosus</i>                                                                                                                                         |     |     | +   | +   | 1   |

|                                                   |   |   |   |   |   |
|---------------------------------------------------|---|---|---|---|---|
| <i>Asphodelus microcarpus</i>                     | + |   | + | + |   |
| <i>Ornithogalum narbonense</i>                    | 2 |   |   |   |   |
| <i>Serapias parviflora</i>                        |   |   |   | + |   |
| <i>Polygala monspeliaca</i>                       |   |   | + |   |   |
| <i>Orobanche ramosa</i>                           |   |   |   |   | + |
| <i>Allium roseum</i>                              | 4 |   |   |   |   |
| <i>Sinapis alba</i>                               |   |   |   | + |   |
| <i>Pallenis spinosa</i>                           | + |   |   |   |   |
| <i>Lolium perenne</i>                             | + |   |   |   |   |
| <i>Anthyllis circinnata</i>                       | + |   |   |   |   |
| <i>Arabis hirsuta</i>                             |   |   |   |   | + |
| <i>Cirsium vulgare</i>                            | + |   |   |   |   |
| <i>Seseli tortuosum</i>                           | + | + | + | + |   |
| <i>Helichrysum italicum</i>                       |   |   |   | 2 |   |
| <i>Dactylis glomerata</i> subsp. <i>hispanica</i> |   |   |   | + | + |
| <i>Hyoseris radiata</i>                           | + | + | + |   | + |
| <i>Linaria purpurea</i>                           |   |   |   | + |   |
| <i>Sixalix atropurpurea</i>                       | + |   |   |   |   |
| <i>Euonymus europaeus</i>                         |   |   |   |   | + |
| <i>Helianthemum salicifolium</i>                  |   | + |   | + |   |
| <i>Briza maxima</i>                               |   | + |   |   |   |
| <i>Aegilops geniculata</i>                        | + | + | + | + |   |
| <i>Sonchus asper</i>                              |   |   |   |   | + |
| <i>Fumaria capreolata</i>                         |   |   |   |   | + |
| <i>Lactuca serriola</i>                           | 1 |   |   |   |   |
| <i>Plantago media</i>                             | 1 |   |   |   |   |
| <i>Galium lucidum</i> subsp. <i>corrudifolium</i> | + |   | + |   |   |
| <i>Crepis neglecta</i>                            |   | + |   | + |   |
| <i>Cuscuta epithymum</i>                          | + |   |   |   |   |
| <i>Asperula aristata</i>                          |   |   |   |   | + |
| <i>Ophrys bombyliflora</i>                        |   | + |   |   |   |
| <i>Convolvulus cantabrica</i>                     | + |   |   |   | + |
| <i>Sanguisorba minor.</i>                         |   | + |   |   |   |
| <i>Centaurea aspera</i>                           | + | + | + |   |   |
