# Supplementary material
Source: MDPI journal article supplement (https://www.mdpi.com/2071-1050/15/23/16469)
Supplement: s1 [file s1]

**Table S1** Indicator species of the different groups calculated using the IndVal index, which considers the index of fidelity (A) and specificity (B). The p-value was also calculated and reported for each value.

| <b>R. alaternus communities (Cluster A)</b> |          |          |             |                |                      |
|---------------------------------------------|----------|----------|-------------|----------------|----------------------|
|                                             | <b>A</b> | <b>B</b> | <b>stat</b> | <b>p.value</b> | <b>Signif. codes</b> |
| <i>Brachypodium rupestre</i>                | 0.83     | 1        | 0.91        | 0.004          | **                   |
| <i>Rhamnus alaternus</i>                    | 0.65     | 1        | 0.81        | 0.048          | *                    |
| <i>Allium roseum</i>                        | 0.98     | 1        | 0.99        | 0.006          | **                   |
| <i>Ornithogalum narbonense</i>              | 0.95     | 1        | 0.98        | 0.004          | **                   |
| <i>Lactuca serriola</i>                     | 0.94     | 1        | 0.97        | 0.014          | *                    |
| <i>Lotus ornithopodioides</i>               | 0.89     | 1        | 0.94        | 0.013          | *                    |
| <i>Echium vulgare</i>                       | 0.88     | 1        | 0.94        | 0.035          | *                    |

| <b>Therophytic grasslands &amp; A. ramosus communities (Clusters B1-I)</b> |          |          |             |                |                      |
|----------------------------------------------------------------------------|----------|----------|-------------|----------------|----------------------|
|                                                                            | <b>A</b> | <b>B</b> | <b>stat</b> | <b>p.value</b> | <b>Signif. codes</b> |
| <i>Lysimachia linum-stellatum</i>                                          | 0.75     | 1        | 0.87        | 0.001          | ***                  |
| <i>Linum bienne</i>                                                        | 1        | 0.67     | 0.82        | 0.038          | *                    |
| <i>Teucrium capitatum</i>                                                  | 0.96     | 0.67     | 0.8         | 0.058          | .                    |
| <i>Sanguisorba minor</i>                                                   | 0.72     | 0.89     | 0.8         | 0.002          | **                   |
| <i>Asperula aristata</i>                                                   | 0.81     | 0.78     | 0.79        | 0.032          | *                    |
| <i>Ononis reclinata</i>                                                    | 0.54     | 1        | 0.74        | 0.001          | ***                  |
| <i>Anagallis arvensis</i>                                                  | 0.67     | 0.78     | 0.72        | 0.001          | ***                  |
| <i>Catapodium rigidum</i>                                                  | 0.59     | 0.89     | 0.72        | 0.001          | ***                  |
| <i>Trifolium campestre</i>                                                 | 0.48     | 0.89     | 0.65        | 0.017          | *                    |
| <i>Trifolium scabrum</i>                                                   | 0.38     | 0.89     | 0.58        | 0.068          | .                    |
| <i>Anthemis arvensis</i>                                                   | 0.31     | 1        | 0.55        | 0.004          | **                   |

| <b>Grave mounds communities (Cluster C)</b> |          |          |             |                |                      |
|---------------------------------------------|----------|----------|-------------|----------------|----------------------|
|                                             | <b>A</b> | <b>B</b> | <b>stat</b> | <b>p.value</b> | <b>Signif. codes</b> |
| <i>Convolvulus cantabrica</i>               | 0.42     | 0.94     | 0.63        | 0.04           | *                    |
| <i>Urospermum dalechampii</i>               | 0.4      | 0.94     | 0.61        | 0.009          | **                   |
| <i>Trifolium stellatum</i>                  | 0.35     | 0.94     | 0.57        | 0.074          | .                    |

| <b>D. villosus communities (Cluster D)</b>        |          |          |             |                |                      |
|---------------------------------------------------|----------|----------|-------------|----------------|----------------------|
|                                                   | <b>A</b> | <b>B</b> | <b>stat</b> | <b>p.value</b> | <b>Signif. codes</b> |
| <i>Dasypyrum villosus</i>                         | 0.81     | 1        | 0.9         | 0.001          | ***                  |
| <i>Silene italica</i>                             | 0.8      | 1        | 0.9         | 0.001          | ***                  |
| <i>Vicia hybrida</i>                              | 0.74     | 1        | 0.86        | 0.001          | ***                  |
| <i>Anchusa azurea</i>                             | 1        | 0.6      | 0.78        | 0.077          | .                    |
| <i>Avena sterilis</i>                             | 0.73     | 0.8      | 0.77        | 0.037          | *                    |
| <i>Geranium molle</i>                             | 0.55     | 1        | 0.74        | 0.029          | *                    |
| <i>Avena barbata</i>                              | 0.38     | 1        | 0.62        | 0.026          | *                    |
| <i>Crepis sancta</i>                              | 0.35     | 1        | 0.6         | 0.091          | .                    |
| <i>Dactylis glomerata</i> subsp. <i>hispanica</i> | 0.34     | 1        | 0.58        | 0.028          | *                    |

| <b>M. sylvestris communities (Cluster E)</b> |  |  |  |  |  |
|----------------------------------------------|--|--|--|--|--|
|----------------------------------------------|--|--|--|--|--|

|                                                | A    | B   | stat | p.value | Signif.<br>codes |
|------------------------------------------------|------|-----|------|---------|------------------|
| <i>Hordeum murinum</i> subsp. <i>leporinum</i> | 1    | 1   | 1    | 0.001   | ***              |
| <i>Malva sylvestris</i>                        | 0.63 | 1   | 0.79 | 0.001   | ***              |
| <i>Erodium cicutarium</i>                      | 0.7  | 0.8 | 0.75 | 0.034   | *                |
| <i>Calendula arvensis</i>                      | 0.44 | 1   | 0.67 | 0.005   | **               |
| <i>Plantago lagopus</i>                        | 0.42 | 1   | 0.65 | 0.099   | .                |
| <i>Sherardia arvensis</i>                      | 0.27 | 1   | 0.52 | 0.071   | .                |

Signif. codes: 0 '\*\*\*' 0.001 '\*\*' 0.01 '\*' 0.05 '.' 0.1 ' ' 1
