# Supplementary material
Source: MDPI journal article supplement (https://www.mdpi.com/2071-1050/15/23/16469)
Supplement: s1 [file s1]

**Table S2** Analytic table of the grassland plant community: communities dominated by *Malva sylvestris* and *Hordeum murinum* (Cluster E; n. 1-5) dominated by *Dasypyrum villosum* and *Avena barbata* (Cluster D; n. 6-10), dominated by *Asphodelus ramosus* and therophytic grasslands with high cover of *Teucrium capitatum* (Cluster B; n. 12-15, 22-26).

| ID PLOT                                                                                                                                                                                                      | 1   | 2  | 3  | 4   | 5   | 6   | 7   | 8   | 9   | 10  | 12 | 13 | 14 | 15 | 22  | 23 | 24 | 25 | 26 |
|--------------------------------------------------------------------------------------------------------------------------------------------------------------------------------------------------------------|-----|----|----|-----|-----|-----|-----|-----|-----|-----|----|----|----|----|-----|----|----|----|----|
| Aspect (°)                                                                                                                                                                                                   | S   | S  | S  | -   | S   | -   | -   | N   | S   | S   | -  | SW | SW | -  | -   | -  | -  | NW | -  |
| Slope (°)                                                                                                                                                                                                    | 5   | 5  | 8  | 0   | 5   | 0   | 0   | 15  | 7   | 5   | 0  | 5  | 5  | 0  | 0   | 0  | 0  | 18 | 0  |
| Total vegetation cover (%)                                                                                                                                                                                   | 100 | 95 | 98 | 100 | 100 | 100 | 100 | 100 | 100 | 100 | 80 | 80 | 80 | 95 | 100 | 90 | 85 | 95 | 95 |
| Species richness                                                                                                                                                                                             | 40  | 31 | 28 | 28  | 26  | 31  | 32  | 28  | 40  | 35  | 57 | 45 | 62 | 57 | 42  | 53 | 52 | 44 | 56 |
| <b><i>Hordeetum leporini</i> Br.-Bl. (1931) 1936 <i>malvetosum sylvestris</i> Braun-Blanquet et al. 1952</b>                                                                                                 |     |    |    |     |     |     |     |     |     |     |    |    |    |    |     |    |    |    |    |
| <i>Hordeum murinum</i> subsp. leporinum                                                                                                                                                                      | 4   | 1  | 3  | 5   | 4   |     |     |     |     |     |    |    |    |    |     |    |    |    |    |
| <i>Malva sylvestris</i>                                                                                                                                                                                      | 5   | 5  | 5  | 5   | 5   |     | 1   | 1   | +   | +   |    |    |    |    |     |    |    |    |    |
| <i>Echium plantagineum</i>                                                                                                                                                                                   |     |    | +  |     |     | +   | +   |     | +   | 1   |    |    | +  |    | +   |    |    |    |    |
| <i>Crepis bursifolia</i>                                                                                                                                                                                     | +   |    | +  |     |     |     |     | +   |     |     |    |    |    |    |     |    |    |    |    |
| <b><i>Hordeion leporini</i> Braun-Blanquet (1931) 1947</b>                                                                                                                                                   |     |    |    |     |     |     |     |     |     |     |    |    |    |    |     |    |    |    |    |
| <i>Erodium ciconium</i>                                                                                                                                                                                      | 2   |    |    | 1   | 1   | 1   | +   | 1   | 1   | 1   |    |    |    |    |     |    |    |    |    |
| <i>Capsella bursa-pastoris</i>                                                                                                                                                                               | +   | +  | +  | +   |     |     | +   |     |     |     |    |    |    |    |     | +  |    |    |    |
| <i>Anthemis arvensis</i>                                                                                                                                                                                     | +   | +  | +  | +   |     | +   | +   |     |     | +   | +  | +  | +  | 1  | +   | +  | 1  | +  | +  |
| <i>Medicago polymorpha</i>                                                                                                                                                                                   |     | +  | +  | +   | +   | +   |     | +   | +   | 1   |    |    |    |    |     |    |    |    |    |
| <i>Plantago lagopus</i>                                                                                                                                                                                      | 2   | +  | 2  | +   | +   |     |     |     |     |     | 1  | +  | 1  |    |     | 1  |    | 1  | +  |
| <i>Diplotaxis tenuifolia</i>                                                                                                                                                                                 |     |    |    |     | +   | 2   |     | +   |     |     |    |    |    |    |     |    |    |    |    |
| <i>Geranium molle</i>                                                                                                                                                                                        | 1   | +  | +  |     | +   | 2   | 2   | 2   | 1   | +   |    |    |    |    | +   |    |    |    |    |
| <i>Veronica polita</i>                                                                                                                                                                                       |     | +  |    |     |     |     |     |     | +   |     | +  | +  | +  |    | +   | +  |    |    |    |
| <i>Galactites tomentosus</i>                                                                                                                                                                                 |     |    |    |     | +   |     |     |     |     |     |    |    |    |    |     |    |    |    |    |
| <b><i>Vulpio ligusticae-Dasypyretum villosi</i> Fanelli 1998 and <i>Securigero securidacae-Dasypyrrion villosi</i> Cano-Ortiz, Biondi et Cano in Cano-Ortiz et al. ex Di Pietro in Di Pietro et al. 2015</b> |     |    |    |     |     |     |     |     |     |     |    |    |    |    |     |    |    |    |    |
| <i>Dasypyrum villosum</i>                                                                                                                                                                                    |     |    |    |     |     | 5   | 5   | 5   | 5   | 5   |    |    |    |    | +   |    | +  |    | +  |
| <i>Avena barbata</i>                                                                                                                                                                                         | 3   | +  | 1  | +   | +   | 1   | 1   | 3   | 5   | 3   |    | +  |    | +  | +   | +  | +  | +  | 1  |
| <i>Reichardia picroides</i>                                                                                                                                                                                  | +   |    |    | +   |     |     | +   | +   | +   | +   | 1  | +  | +  | +  | +   | +  | +  | +  | +  |
| <i>Avena sterilis</i>                                                                                                                                                                                        |     |    |    |     |     | +   |     | 1   | 1   | 3   |    |    |    |    | +   |    |    |    |    |
| <i>Foeniculum vulgare</i>                                                                                                                                                                                    | +   | +  |    |     |     |     |     | +   |     |     |    |    |    |    | +   |    |    |    |    |
| <i>Lotus ornithopodioides</i>                                                                                                                                                                                |     |    |    |     |     | +   | +   |     | +   |     |    | +  |    | +  | +   | +  | +  | +  | +  |
| <i>Festuca ligustica</i>                                                                                                                                                                                     | +   | +  |    |     |     |     |     |     | +   |     |    | +  | +  | +  |     |    |    |    |    |
| <b><i>Brometalia rubenti-tectorum</i> (Rivas Godayet Rivas-Mart. 1973) Rivas-Mart. et Izco 1977 and <i>Chenopodietea</i> Br.-Bl. in Br.-Bl. et al. 1952</b>                                                  |     |    |    |     |     |     |     |     |     |     |    |    |    |    |     |    |    |    |    |
| <i>Crepis sancta</i>                                                                                                                                                                                         | +   | +  | +  | +   | +   | +   | +   | +   | +   | +   |    |    | +  |    |     | 1  |    |    |    |
| <i>Bromus madritensis</i>                                                                                                                                                                                    | +   |    |    |     |     | +   | +   | +   |     |     |    |    |    |    |     |    | +  |    |    |
| <i>Convolvulus arvensis</i>                                                                                                                                                                                  | 2   | +  |    |     |     | +   | +   |     | +   | +   |    |    |    |    |     |    |    |    |    |
| <i>Reseda lutea</i>                                                                                                                                                                                          |     |    |    | +   |     |     |     |     |     |     |    |    |    |    |     |    |    |    |    |
| <i>Papaver rhoeas</i>                                                                                                                                                                                        |     |    |    |     |     |     | +   |     |     |     |    |    |    |    |     |    |    |    |    |
| <i>Poa annua</i>                                                                                                                                                                                             | +   | 1  | +  | +   |     |     |     |     |     |     |    |    |    |    |     |    |    |    |    |
| <i>Scandix pecten-veneris</i>                                                                                                                                                                                |     |    | +  |     |     |     |     |     |     |     |    |    |    |    |     |    |    |    |    |
| <i>Senecio vulgaris</i>                                                                                                                                                                                      |     |    |    | +   | +   |     |     |     |     |     |    |    |    |    |     |    |    |    |    |
| <i>Tordylium apulum</i>                                                                                                                                                                                      | +   |    | +  |     |     | +   | +   |     |     |     | +  |    | +  |    | +   | +  | +  | +  |    |
| <i>Raphanus raphanistrum</i>                                                                                                                                                                                 |     |    |    |     |     |     |     |     | +   | 1   |    |    |    |    |     |    |    |    |    |
| <i>Vicia sativa</i>                                                                                                                                                                                          |     |    |    |     |     | +   | 3   |     | 1   | 1   |    |    |    |    |     |    |    |    |    |
| <i>Sonchus oleraceus</i>                                                                                                                                                                                     |     |    |    |     |     | +   |     | +   |     |     |    |    |    |    | +   |    |    |    |    |
| <i>Carduus pycnocephalus</i>                                                                                                                                                                                 |     |    |    |     |     |     |     |     |     |     | +  |    |    |    |     |    |    |    |    |

|                                                         |   |  |   |  |  |   |  |   |  |   |   |   |   |   |   |  |  |   |   |   |
|---------------------------------------------------------|---|--|---|--|--|---|--|---|--|---|---|---|---|---|---|--|--|---|---|---|
| <i>Onosma echiioides</i>                                |   |  |   |  |  |   |  |   |  | 1 |   | 1 |   |   |   |  |  | + |   | 2 |
| <i>Anthyllis vulneraria</i> L. subsp. <i>rubriflora</i> |   |  |   |  |  |   |  |   |  |   | 1 |   | + |   | + |  |  | 1 |   |   |
| <i>Teucrium capitatum</i>                               |   |  |   |  |  |   |  |   |  | 1 | 4 |   | 1 |   | 2 |  |  | + |   | 2 |
| <i>Satureja montana</i>                                 |   |  |   |  |  |   |  |   |  |   |   |   |   |   | 2 |  |  |   |   | + |
| <i>Helianthemum apenninum</i>                           |   |  |   |  |  |   |  |   |  | + |   |   | + |   |   |  |  | + |   | + |
| <i>Ophrys bombyliflora</i>                              |   |  |   |  |  |   |  |   |  | + | + |   | + |   | + |  |  | + |   | + |
| <i>Ophrys tarquinia</i>                                 |   |  |   |  |  |   |  |   |  |   |   |   |   |   | + |  |  |   |   |   |
| <i>Centaurea aspera</i>                                 | + |  | + |  |  | + |  | + |  | + |   |   |   |   |   |  |  | + |   | 2 |
| <i>Serapias parviflora</i>                              |   |  |   |  |  |   |  |   |  | + |   |   | + |   | + |  |  | + |   | + |
| <i>Convolvulus cantabrica</i>                           |   |  |   |  |  |   |  |   |  |   |   | + |   | + |   |  |  |   |   |   |
| <i>Petrorhagia saxifraga</i>                            |   |  |   |  |  |   |  |   |  |   | + |   |   |   |   |  |  |   |   |   |
| <i>Thesium humifusum</i>                                |   |  |   |  |  |   |  |   |  |   |   |   |   |   |   |  |  |   |   |   |
| <i>Sanguisorba minor</i>                                |   |  |   |  |  |   |  |   |  | 2 | 2 |   | 3 |   | 1 |  |  | 1 | 2 | + |
| <i>Asperula aristata</i>                                |   |  |   |  |  |   |  |   |  | 2 | 1 |   | 1 |   | + |  |  | + | + | + |

|                              |   |   |   |   |   |
|------------------------------|---|---|---|---|---|
| <i>Brachypodium rupestre</i> |   |   |   | 3 | 1 |
| <i>Bromus erectus</i>        | 3 | + | + | 2 | + |
| <i>Galium lucidum</i>        |   |   |   | + | + |

|                                 |  |   |   |   |   |   |   |   |   |   |
|---------------------------------|--|---|---|---|---|---|---|---|---|---|
| <i>Ajuga iva</i>                |  |   | + | + |   | + |   | + |   | + |
| <i>Allium roseum</i>            |  |   |   |   |   |   |   |   |   | + |
| <i>Anisantha rubens</i>         |  |   |   |   |   |   |   |   |   | + |
| <i>Bellardia trixago</i>        |  |   |   |   | + |   |   |   |   |   |
| <i>Blackstonia perfoliata</i>   |  |   |   | + | + | + |   | + |   | + |
| <i>Carduus nutans</i>           |  |   |   | + | + | + |   | + |   |   |
| <i>Centaurium erythraea</i>     |  |   | + | + | + | + |   |   |   |   |
| <i>Clinopodium nepeta</i>       |  |   |   |   |   |   |   | + |   | 1 |
| <i>Crupina vulgaris</i>         |  |   |   |   |   |   |   | + |   |   |
| <i>Filago germanica</i>         |  |   | + |   |   | + |   |   |   | + |
| <i>Galium murale</i>            |  |   |   |   |   |   |   | + |   |   |
| <i>Hedypnois rhagadioloides</i> |  |   |   |   |   |   |   |   | + |   |
| <i>Lysimachia arvensis</i>      |  |   | + | + | + | + |   | + | + | + |
| <i>Phleum hirsutum</i>          |  |   |   |   |   |   |   | + |   |   |
| <i>Poa trivialis</i>            |  |   |   |   |   |   | + |   |   |   |
| <i>Polygala monspeliaca</i>     |  |   | + |   |   | + |   |   | + |   |
| <i>Silene pendula</i>           |  |   |   |   |   | + |   |   |   |   |
| <i>Sinapis alba</i>             |  |   |   |   |   |   |   | + |   |   |
| <i>Stachys ocymastrum</i>       |  |   |   |   |   |   |   | + | + |   |
| <i>Trifolium resupinatum</i>    |  |   |   |   | + |   |   | + | + | + |
| <i>Rhamnus alaternus</i>        |  |   |   |   |   |   |   | + |   |   |
| <i>Phillyrea latifolia</i>      |  |   |   |   | + |   |   |   |   |   |
| <i>Clematis flammula</i>        |  |   | 1 | + | + |   |   |   |   |   |
| <i>Hypericum perforatum</i>     |  |   |   |   |   |   |   |   |   | + |
| <i>Spartium junceum</i>         |  |   |   |   |   | + |   |   |   |   |
| <i>Lathyrus cicera</i>          |  |   |   |   |   |   |   | + |   |   |
| <i>Medicago orbicularis</i>     |  |   |   |   |   |   |   | + |   |   |
| <i>Borago officinalis</i>       |  |   |   |   |   |   | + |   |   |   |
| <i>Bellis perennis</i>          |  | + |   |   | + |   |   |   |   | + |
